# Supplementary material for: Anti-Obesity Effects of Ecklonia cava Extract in High-Fat Diet-Induced Obese Rats
Source: MDPI journal article supplement (doi:10.3390/antiox11020310), 2022-02-03
Supplement: s1 [file s1]

# Anti-obesity effects of *Ecklonia cava* extract in high-fat diet-induced obese rats

(Supplementary Data)

**Table S1.** Base sequences of adipogenic and lipogenic primers with their PCR conditions.

| Primers        | Base Sequences                                                 | Polymerase Chain Reaction Conditions                                                                           |
|----------------|----------------------------------------------------------------|----------------------------------------------------------------------------------------------------------------|
| PPAR- $\gamma$ | F: CCA GAG TCT GCT GAT CTG CG<br>R: GCC ACC TCT TTG CTC TGA TC | Denaturation at 95 °C for 45 s, annealing at 58 °C for 45 s, and synthesizing at 72 °C for 45 s with 35 cycles |
| FAS            | F: GGCTCAGCATGGTCGCTT<br>R: CTCCCGCCAGCTGTCATT                 | Denaturation at 94 °C for 30 s, annealing at 60 °C for 45 s, and synthesizing at 72 °C for 30 s with 35 cycles |
| LPL            | F: GATTTCTCTGTACGGCACAGTGG<br>R: TTTGTGGAAACCTCGGGC            | Denaturation at 94 °C for 30 s, annealing at 58 °C for 45 s, and synthesizing at 72 °C for 30 s with 35 cycles |
| SREBP-1C       | F: GTAGCGTCTGCACGCCCTA<br>R: CTTGGTTGTTGATGAGCTGGAG            | Denaturation at 94 °C for 45 s, annealing at 58 °C for 45 s, and synthesizing at 72 °C for 45 s with 35 cycles |
| $\beta$ -actin | F: ATGCTCCTGCTTGAGT A GT,<br>R: GAGGAAGAGGATGCGGCAGT           | Denaturation at 95 °C for 45 s, annealing at 55 °C for 45 s, and synthesizing at 72 °C for 45 s with 30 cycles |

\*F, forward; R, reverse.

**Table S2.** The important bioactive compound in *E. cava* was identified by GCMS analysis.

|   | Compounds                                | RT     | Area (%) | Functions                                                                                                                                   | Chemical Formula                                        | Ref.       |
|---|------------------------------------------|--------|----------|---------------------------------------------------------------------------------------------------------------------------------------------|---------------------------------------------------------|------------|
| 1 | Benzoyl bromide                          | 27.080 | 10.84    | Antibacterial, Antifungal, antioxidant, and anti-obesity activity.                                                                          | C <sub>7</sub> H <sub>5</sub> BrO                       | [1]<br>[2] |
| 2 | 2-Propanol                               | 27.764 | 3.23     | Antibacterial properties and anti-prions activity with combinations.                                                                        | C <sub>3</sub> H <sub>8</sub> O                         | PubChem    |
| 3 | Benzene, 1,3-bis(1,1-dimethylethyl)-     | 36.529 | 2.95     | It could be used as the base data for the effect of $\gamma$ -irradiation on the medicinal herb.                                            | C <sub>14</sub> H <sub>22</sub>                         | [3]        |
| 4 | Docosane                                 | 37.478 | 2.34     | The active ingredient in plant extract has antioxidant and anti-obesity and antibacterial activities.                                       | C <sub>22</sub> H <sub>46</sub>                         | [4,5]      |
| 5 | Dodecanal                                | 53.494 | 3.14     | Antibacterial activity and plant extracts which are recently reported for their significant anti-obesity, dodecanal was abundantly present. | C <sub>12</sub> H <sub>24</sub> O                       | [6-8]      |
| 6 | Methyl salicylate                        | 57.019 | 62.5     | Analgesic, counter-irritant, and anti-inflammatory activities.                                                                              | C <sub>8</sub> H <sub>8</sub> O <sub>3</sub>            | [8,9]      |
| 7 | Tris(tert-butyl)dimethylsilyl oxy)arsane | 59.083 | 1.76     | Antifungal, antibacterial, and antifungal. Abundantly present in the polyherbal extract which was reported for its anti-obesity effects.    | C <sub>18</sub> H <sub>45</sub> AsO<br>3Si <sub>3</sub> | [10,11]    |
|   | Arsenous acid                            | 59.083 | 1.76     | Anticancer activity                                                                                                                         | AsH <sub>3</sub> O <sub>3</sub>                         | [12]       |
| 8 | Benzaldehyde, 4-propyl-                  | 59.749 | 2.02     | Antimicrobial activity                                                                                                                      | C <sub>10</sub> H <sub>12</sub> O                       | [13]       |
| 9 | 2,4-Di-tert-butylphenol                  | 83.226 | 9.26     | Antifungal, antioxidant, Anti-inflammatory activities.                                                                                      | C <sub>14</sub> H <sub>22</sub> O                       | [14,15]    |

RT—retention time.

**Table S3.** Effects of *Ecklonia cava* ethanol (70%) extract on major organs including liver, spleen, and kidney of rats fed with normal diet (NC), a high-fat diet (HFD), or HFD accompanied with treatment ECE at different doses of 125 mg (T1), 250 mg (T2), and 500 mg (T3) per kg B.W.

| Groups          | Liver wt. (gm/rat)          | Spleen wt. (gm/rat) | Kidney wt. (gm/rat)      |
|-----------------|-----------------------------|---------------------|--------------------------|
| NC              | 12.67 ± 1.34                | 0.78 ± 0.14         | 1.60 ± 0.22*             |
| HFD             | 17.82 ± 1.80 <sup>+++</sup> | 0.97 ± 0.22         | 1.92 ± 0.22 <sup>+</sup> |
| HCA (250 mg/kg) | 13.89 ± 2.5*                | 0.98 ± 0.26         | 1.82 ± 0.17              |
| EC (125 mg/kg)  | 14.78 ± 2.97                | 1.0 ± 0.19          | 1.80 ± 0.33              |
| EC (250 mg/kg)  | 13.84 ± 2.71*               | 0.82 ± 0.129        | 1.72 ± 0.15              |
| EC (500 mg/kg)  | 12.76 ± 1.89 <sup>***</sup> | 0.79 ± 0.16         | 1.64 ± 0.04*             |

Data are presented as means ± SEM (n = 8 for each group). \* $p < 0.05$ , \*\*  $p < 0.01$ , \*\*\*  $p < 0.001$  vs. HFD group, +  $p < 0.05$ , ++  $p < 0.01$ , and +++  $p < 0.001$  vs normal control group.

**Table S4.** Effects on visceral fat, including mesenteric fat, subcutaneous fat, peritoneal fat and epididymal fat weights of rats fed with normal diet (NC), a high-fat diet (HFD) or HFD accompanied with treatment ECE at different doses of 125 mg (T1), 250 mg (T2), and 500 mg (T3) per kg B.W.

|                 | Subcutaneous wt. (gm/rat) | Mesenteric wt. (gm/rat)    | Peritoneal wt. (gm/rat)    | Epididymal wt. (gm/rat)    |
|-----------------|---------------------------|----------------------------|----------------------------|----------------------------|
| NC              | 4.25 ± 2.96 <sup>**</sup> | 3.75 ± 1.78 <sup>***</sup> | 4.13 ± 1.64 <sup>***</sup> | 3.42 ± 1.34 <sup>***</sup> |
| HFD             | 14.9 ± 8.23 <sup>++</sup> | 8.4 ± 2.92                 | 9.14 ± 2.33 <sup>+++</sup> | 7.46 ± 2.00 <sup>+++</sup> |
| HCA (250 mg/kg) | 11.06 ± 6.54              | 5.59 ± 1.14*               | 7.25 ± 1.81 <sup>++</sup>  | 6.12 ± 1.76 <sup>++</sup>  |
| EC (125 mg/kg)  | 8.53 ± 3.71               | 5.84 ± 2.44                | 7.50 ± 1.54 <sup>++</sup>  | 5.63 ± 1.16 <sup>+</sup>   |
| EC (250 mg/kg)  | 7.17 ± 2.42*              | 5.11 ± 2.22*               | 7.32 ± 1.22 <sup>++</sup>  | 4.98 ± 1.19*               |
| EC (500 mg/kg)  | 6.49 ± 1.84*              | 4.62 ± 0.90 <sup>**</sup>  | 5.84 ± 1.57 <sup>**</sup>  | 4.75 ± 0.97 <sup>**</sup>  |

Data are presented as means ± SEM (n = 8 for each group). \*  $p < 0.05$ , \*\*  $p < 0.01$ , \*\*\*  $p < 0.001$  vs. HFD group, +  $p < 0.05$ , ++  $p < 0.01$ , and +++  $p < 0.001$  vs. normal control group.

**Table S5.** Effects on lipid profile of rats fed with normal diet; and high-fat diet with or without treatment of different doses of ECE (125, 250, and 500 mg/kg b.w) for 8 weeks.

| Parameter       | TC (mg/dL)           | HDL (mg/dL)     | LDL (mg/dL)          | AI                   | Free-fatty acid (μM) | TG (mg/mL)        |
|-----------------|----------------------|-----------------|----------------------|----------------------|----------------------|-------------------|
| NC              | 121.53 ± 4.38***     | 102.87 ± 3.4*** | 18.67 ± 4.27***      | 120.53 ± 3.44***     | 0.26 ± 0.002***      | 282.86 ± 44.38*** |
| HFD             | 193.54 ± 2.94***     | 77.05 ± 5.78*** | 116.49 ± 6.0***      | 192.54 ± 3.81***     | 0.79 ± 0.07***       | 682.79 ± 14.59*** |
| HCA (250 mg/kg) | 121.74 ± 4.37***     | 100.48 ± 7.1**  | 21.27 ± 5.14***      | 120.74 ± 1.34***     | 0.22 ± 0.01***       | 304.60 ± 86.25*** |
| EC (125 mg/kg)  | 153.9 ± 3.7***<br>++ | 87.66 ± 5.59*** | 66.21 ± 3.5***<br>++ | 152.9 ± 4.4***<br>++ | 0.52 ± 0.03          | 500.60 ± 42.48    |
| EC (250 mg/kg)  | 125.51 ± 7.76***     | 91.76 ± 6.95*   | 33.74 ± 4.50***      | 124.51 ± 5.15***     | 0.42 ± 0.14*         | 331.28 ± 9.93***  |
| EC (500 mg/kg)  | 119.82 ± 10.7***     | 97.75 ± 6.60**  | 22.07 ± 5.82***      | 118.82 ± 4.11***     | 0.37 ± 0.03**        | 226.37 ± 51.76*** |

Data are presented as means ± SEM (n = 8 for each group). \*  $p < 0.05$ , \*\*  $p < 0.01$ , \*\*\*  $p < 0.001$  vs. HFD group, +  $p < 0.05$ , ++  $p < 0.01$ , and +++  $p < 0.001$  vs normal control group.

**Table S6.** Effects of *Ecklonia cava* ethanol (70%) extract (ECE) on plasma biomarkers as liver function enzymes in rats fed with normal diet; and high-fat diet with or without treatment of different doses of ECE (125, 250, and 500 mg/kg b.w) for 8 weeks.

| Parameter       | AST (U/L)       | ALP (U/L)      | ALT (U/L)      | GGT (U/L)    |
|-----------------|-----------------|----------------|----------------|--------------|
| NC              | 8.78 ± 0.96***  | 2.25 ± 0.35*** | 1.31 ± 0.18*** | 8.04 ± 1.25  |
| HFD             | 17.62 ± 0.83*** | 7.92 ± 0.93*** | 7.79 ± 0.98*** | 15.92 ± 6.43 |
| HCA (250 mg/kg) | 11.84 ± 1.48**  | 2.97 ± 0.18*** | 1.84 ± 0.53*** | 7.23 ± 0.57  |
| EC (125 mg/kg)  | 13.78 ± 1.37*   | 4.49 ± 0.41*** | 3.37 ± 0.46*** | 8.10 ± 7.78  |
| EC (250 mg/kg)  | 13.09 ± 0.29*   | 4.26 ± 0.09*** | 2.65 ± 0.27*** | 8.31 ± 5.8   |
| EC (500 mg/kg)  | 10.87 ± 0.02**  | 2.61 ± 0.37*** | 1.68 ± 0.29*** | 8.50 ± 5.17  |

Data are presented as means ± SEM (n = 8 for each group). \*  $p < 0.05$ , \*\*  $p < 0.01$ , \*\*\*  $p < 0.001$  vs. HFD group, +  $p < 0.05$ , ++  $p < 0.01$  and +++  $p < 0.001$  vs. normal control group.

**Table S7.** Comparison of different published studies related to anti-obesity effects of *Ecklonia cava* and current study.

| Animal                         | Body +<br>organs<br>+ fat<br>weight | Plasma<br>biomarkers                               | Liver<br>biomarkers   | Glucose,<br>Insuline | Histology<br>Liver,<br>Adipoe<br>tissue | Gene<br>expression | 3T3-<br>L1 | Antioxident<br>DPPH,<br>ABTS assay | Ref               |
|--------------------------------|-------------------------------------|----------------------------------------------------|-----------------------|----------------------|-----------------------------------------|--------------------|------------|------------------------------------|-------------------|
| <b>Sprague–Dawley<br/>rats</b> | Yes                                 | TC,TG,FFA,<br>HDL, LDL,<br>leptin,<br>ghrelin, GIP | ALT, AST,<br>GGT, AST | Yes                  | Yes                                     | Yes                | Yes        | Both DPPH<br>and ABTS              | Our<br>Manuscript |
| <b>C57BL/6N mice</b>           | Yes                                 | TC,HDL,<br>leptin, GOT,<br>GPT,                    | liver- TG             | Yes                  | -                                       | Yes                | -          | -                                  | [16]              |
| <b>C57BL/6NTacSam<br/>mice</b> | Yes                                 | HDL, LDL,<br>liptin                                | Liver- TG             | Glucose              | -                                       | Yes                | -          | -                                  | [17]              |
| <b>C57BL/6N mice</b>           | Yes                                 | IL-6, TNF-a,<br>IL-10                              | -                     | -                    | Adipos<br>tissue                        | -                  | -          | -                                  | [18]              |
| <b>Male C57BL/6<br/>mice</b>   | Yes                                 | TG, TC,<br>HDL,<br>GOT,GPT                         | -                     | Glucose              | Liver                                   | Yes                | -          | -                                  | [19]              |
| <b>C57BL/6 mice</b>            | Yes                                 | TG,<br>TC,HDL,LDL                                  | ALT,AST               | Glucose              | -                                       | Yes                | -          | -                                  | [20]              |

Data presented in table is only for comparison prospective.

## References

1. Laxmi, M.V.; Ravi, G.; Nath, A.R. Synthesis, Characterization of substituted 4-(bromomethyl)-N-(4-ethyl-6-methylpyrimidin-2-yl) benzamide Derivatives and Evaluation of their Anti-microbial activity.
2. Roh, C.; Jung, U.; Jo, S.-K. Screening of anti-obesity agent from herbal mixtures. *Molecules* **2012**, *17*, 3630-3638.
3. Shim, S.-L.; Hwang, I.-M.; Ryu, K.-Y.; Jung, M.-S.; Seo, H.-y.; Kim, H.-Y.; Song, H.-P.; Kim, J.-H.; Lee, J.-W.; Byun, M.-W. Effect of  $\gamma$ -irradiation on the volatile compounds of medicinal herb, *Paeoniae Radix*. *Radiation Physics and Chemistry* **2009**, *78*, 665-669.
4. Hifnawy, M.S.; Issaa, M.Y.; El-Seedi, H.; Mahrous, A.M.; Ashour, R. Phytochemical study, nutritional evaluation and in vitro antiobesity potential of fruits pericarp and seeds of *Livistona carinensis* and *Thrinax parviflora*. *Jordan Journal of Biological Sciences* **2021**, *14*.
5. Karabay-Yavasoglu, N.U.; Sukatar, A.; Ozdemir, G.; Horzum, Z. Antimicrobial activity of volatile components and various extracts of the red alga *Jania rubens*. *Phytotherapy Research: An International Journal Devoted to Pharmacological and Toxicological Evaluation of Natural Product Derivatives* **2007**, *21*, 153-156.

6. Roussis, V.; Tsoukatou, M.; Chinou, I.B.; Ortiz, A. Composition and Antibacterial Activity of the Essential Oils of *Helichrysum rupestre* and *H. ambiguum* Growing in the Balearic Islands<sup>1</sup> (Part III). *Planta medica* **1998**, *64*, 675-676.
7. Fujita, K.i.; Chavasiri, W.; Kubo, I. Anti-Salmonella Activity of Volatile Compounds of Vietnam Coriander. *Phytotherapy Research* **2015**, *29*, 1081-1087.
8. Cruz, L.G.-d.l.; Caballero-Caballero, S.; Zamudio, S.; Duarte-Lisci, G.; Navarrete, A. Essential Oil Composition of Aerial Parts of *Hypericum silenoides* Juss. and *Hypericum philonotis* Cham. & Schlecht. Growing in Central Mexico §. *Journal of Essential Oil Bearing Plants* **2013**, *16*, 456-460.
9. Michel, P.; Granica, S.; Rosińska, K.; Rojek, J.; Poraj, Ł.; Olszewska, M.A. Biological and chemical insight into *Gaultheria procumbens* fruits: a rich source of anti-inflammatory and antioxidant salicylate glycosides and procyanidins for food and functional application. *Food & Function* **2020**, *11*, 7532-7544.
10. Salim, S.A. IN VITRO INDUCTION OF CALLUS FROM DIFFERENT EXPLANTS OF *TERMINALIA ARJUNA* (ROXB.) WIGHT AND ARN. AND DETECTION OF ITS ACTIVE SECONDARY METABOLITES USING GC-MS ANALYSIS. *Plant Archives* **2018**, *18*, 2519-2527.
11. Fadahunsi, O.; Adegbola, P.; Akintola, O.A.; Ajilore, B.S. The role of poly-herbal extract in sodium chloride-induced oxidative stress and hyperlipidemia in male Wistar rats. **2021**.
12. Swindell, E.P.; Hankins, P.L.; Chen, H.; Miodragović, Đ.U.; O'Halloran, T.V. Anticancer activity of small-molecule and nanoparticulate arsenic (III) complexes. *Inorganic chemistry* **2013**, *52*, 12292-12304.
13. Li, W.; Wang, P.J.; Shigematsu, M.; Lu, Z.G. Chemical composition and antimicrobial activity of essential oil from *Amomum tsao-ko* cultivated in Yunnan area. In *Proceedings of the Advanced Materials Research*, 2011; pp. 910-914.
14. Zhao, F.; Wang, P.; Lucardi, R.D.; Su, Z.; Li, S. Natural sources and bioactivities of 2, 4-di-tert-butylphenol and its analogs. *Toxins* **2020**, *12*, 35.
15. Varsha, K.K.; Devendra, L.; Shilpa, G.; Priya, S.; Pandey, A.; Nampoothiri, K.M. 2, 4-Di-tert-butyl phenol as the antifungal, antioxidant bioactive purified from a newly isolated *Lactococcus* sp. *International journal of food microbiology* **2015**, *211*, 44-50.
16. Kim, I.H.; Choi, J.W.; Lee, M.K.; Kwon, C.J.; Nam, T.J. Anti-obesity effects of pectinase and cellulase enzyme-treated *Ecklonia cava* extract in high-fat diet-fed C57BL/6N mice. *International journal of molecular medicine* **2018**, *41*, 924-934.
17. Kim, S.-Y.; Yun, I.-J.; Kwon, C.-J.; Choi, J.-W.; Kim, Y.-M.; Kang, M.-H.; Lee, M.-K.; Nam, T.-J. The effects of anti-obesity on enzyme-treated *Ecklonia cava* extracts. *Korean Journal of Fisheries and Aquatic Sciences* **2014**, *47*, 363-369.
18. Son, M.; Oh, S.; Choi, J.; Jang, J.T.; Choi, C.H.; Park, K.Y.; Son, K.H.; Byun, K. The phlorotannin-rich fraction of *Ecklonia cava* extract attenuated the expressions of the markers related with Inflammation and leptin resistance in adipose tissue. *International journal of endocrinology* **2020**, *2020*.
19. Eo, H.; Jeon, Y.-j.; Lee, M.; Lim, Y. Brown Alga *Ecklonia cava* polyphenol extract ameliorates hepatic lipogenesis, oxidative stress, and inflammation by activation of AMPK and SIRT1 in high-fat diet-induced obese mice. *Journal of agricultural and food chemistry* **2015**, *63*, 349-359.
20. Park, E.Y.; Kim, E.H.; Kim, M.H.; Seo, Y.W.; Lee, J.I.; Jun, H.S. Polyphenol-rich fraction of brown alga *Ecklonia cava* collected from Gijang, Korea, reduces obesity and glucose levels in high-fat diet-induced obese mice. *Evidence-based complementary and alternative medicine* **2012**, *2012*.
